# Supplementary material for: Mapping immune imprinting zones enables predictive vaccination optimization
Source: Research Square preprint supplement (doi:10.21203/rs.3.rs-7719056/v1), 2025-10-09
Supplement: Supplementary file 1 [file 0b02981075ff63cec11ca834.xlsx]

## Sheet: Sheet1
Supplementary Table 16 Geometric mean titer of neutralizing antibodies against SARS-CoV-2 variants at 14 days after two-dose mRNA variant boosters based on two-dose CoronaVac and geometric mean ratio comparing to the prototype, alpha and RQ3013, respectively.
Vaccine type	mRNA(Alpha/Beta)	mRNA(Delta)	mRNA(BA.1)	mRNA(BA.2/4/5)	mRNA(BA.2/4/5+Alpha/Beta)	mRNA(XBB.1.5+Alpha/Beta)	mRNA(XBB.1.5)
	(n=8)	(n=8)	(n=8)	(n=8)	(n=8)	(n=8)	(n=8)
Neutralizing antibodies against the protoype
GMT	54554.1 (27214.2-109360.2)	76116.4 (35319.2-164038.2)	29523.2 (16051.0-54303.0)	15670.2 (8030.6-30577.4)	44938.4 (21321.9-94713.1)	10127.5 (4999.2-20516.8)	7846.5 (3494.7-17617.7)
GMR1	-	-	-	-	-	-	-
P1	-	-	-	-	-	-	-
GMR2	0.75 (0.27 -2.04)	0.99 (0.35-2.85)	1.40 (0.44-1-4.79)	2.89 (1.09-7.67)	0.83 (0.36-1.89)	0.49 (0.22-1.08)	4.86 (2.06-11.55)
P2	0.567	0.986	0.587	0.034	0.651	0.077	< 0.001
Neutralizing antibodies against the variant alpha
GMT	72970.8 (36376.2-146379.5)	76811.5 (34555.5-170740.3)	21061.9 (10315.9-43002.1)	5427.4 (2511.7-11727.4)	54238.6 (19305.3-152384.0)	20707.3 (9828.7-43626.8)	1612.4 (689.7-3769.8)
GMR1	1.34(0.49-3.66)	1.01 (0.35-2.89)	0.71 (0.21-2.45)	0.35 (0.13-0.92)	1.21 (0.53-2.75)	2.04 (0.93-4.53)	0.21 (0.09-0.49)
P1	0.564	0.732	0.587	0.034	0.651	0.077	< 0.001
GMR2	-	-	-	-	-	-	-
P2	-	-	-	-	-	-	-
Neutralizing antibodies against the variant beta
GMT	50129.1 (25037.7-100365.9)	47129.6 (24673.7-90023.3)	12280.8 (5411.8-27868.1)	8577.2 (4557.2-20375.5)	37844.2 (19055.7-75157.5)	10939.4 (5410.7-22117.3)	1585.7 (666.4-3773.1)
GMR1	0.92 (0.34-2.51)	0.62 (0.22-1.78)	0.41 (0.12-1.42)	0.55 (0.21-1.48)	0.84 (0.37-1.92)	1.08 (0.49-2.39)	0.20 (0.09-0.49)
P1	0.868	0.668	0.16	0.224	0.68	0.847	< 0.001
GMR2	0.69 (0.25 -1.88)	0.62 (0.21-1.77)	0.58 (0.17-2.00)	1.58 (0.59-4.20)	0.70 (0.31-1.59)	0.53 (0.24-1.16)	0.99 (0.41-2.33)
P2	0.46	0.359	0.386	0.355	0.388	0.114	0.969
-1.79-3.75
GMT	26714.5 (1815.8-9714.6)	38516.5 (21509.6-68970.3)	11544.8 (5429.3-24548.7)	10380.2 (5288.2-20375.5)	19433.4 (9699.1-38937.4)	1115.8 (569.5-2186.0)	84.6 (42.8-167.2)
GMR1	0.49 (0.18-1.34)	0.51 (0.18-1.45)	0.39 (0.11-1.34)	0.66 (0.25-1.77)	0.43 (0.19-0.99)	0.11 (0.05-0.24)	0.01 (0.005-0.03)
P1	0.162	0.036	0.133	0.405	0.046	< 0.001	< 0.001
GMR2	0.37 (0.13-1.0)	0.50 (0.17-1.43)	0.55 (0.16-1.88)	1.92 (0.72-5.10)	0.36 (0.16-0.82 )	0.05 (0.02-0.12)	0.05 (0.02-0.12)
P2	0.05	0.196	0.334	0.191	0.015	< 0.001	< 0.001
Neutralizing antibodies against the omicron sublineage BA.1
GMT	3926.0 (1911.6-8063.1)	1978.8 (601.6-6509.5)	48638.0 (20063.6-117907.6)	11541.0 (3402.8-39142.3)	11013.8 (5325.7-22776.9)	1611.2 (928.2-2797.0)	156.8 (97.8-251.3)
GMR1	0.07 (0.03-0.20)	0.03 (0.01-0.07)	1.65 (0.48-5.66)	0.74 (0.28-1.96)	0.24 (0.11-0.56)	0.16 (0.07-0.35)	0.02 (0.01-0.05)
P1	< 0.001	< 0.001	0.422	0.536	0.001	< 0.001	< 0.001
GMR2	0.04 (0.02 -0.15)	0.03 (0.01-0.07)	2.31 (0.67-7.89)	2.13 (0.8-5.66)	0.20 (0.09-0.46)	0.08 (0.04-0.17)	0.10 (0.04-0.23)
P2	< 0.001	< 0.001	0.18	0.139	< 0.001	< 0.001	< 0.001
Neutralizing antibodies against the omicron sublineage BA.2
GMT	2650.7 (1300.0-5404.4)	1866.9 (828.0-4209.4)	10828.9 (3709.7-31610.2)	18397.3 (6660.0-50819.9)	47698.0 (26382.7-86234.78)	8723.9 (4051.2-18785.9)	1843.3 (863.4-3935.5)
GMR1	0.05 (0.02-0.14)	0.02 (0.01-0.06)	0.37 (0.11-1.26)	1.17 (0.44-3.12)	1.06 (0.47-2.43)	0.86 (0.39-1.91)	0.83 (0.35-1.97)
P1	< 0.001	< 0.001	< 0.001	0.769	0.121	0.433	0.67
GMR2	0.04 (0.01-0.11)	0.02 (0.01-0.06)	0.14 (0.04-0.49)	3.39 (1.27-9.00)	0.43 (0.19-0.99)	0.67 (0.30-1.48)	4.03 (1.71-9.58)
P2	< 0.001	< 0.001	0.002	0.016	0.757	0.318	0.002
Neutralizing antibodies against the omicron sublineage BA.4/BA.5
GMT	2808.9 (1201.9-6564.6)	1524.8 (409.3-5680.9)	3024.1 (704.8-12975.2)	18115.0 (8288.4-39591.7)	23458.1 (17334.9-31744.4)	13870.1 (6548.6-29377.3)	6514.0 (2600.4-16317.7)
GMR1	0.05 (0.02-0.13)	0.02 (0.01-0.07)	0.10 (0.03-0.35)	1.16 (0.44-3.17)	0.52 (0.23-1.19)	1.37 (0.62-3.03)	0.23 (0.10-0.56)
P1	< 0.001	< 0.001	0.092	0.745	0.886	0.71	0.001
GMR2	0.04 (0.01 -0.10)	0.02 (0.01-0.07)	0.51 (0.15-1.77)	3.34 (1.26-8.88)	0.88 (0.39-2.00 )	0.42 (0.19-0.93)	1.14 (0.48-2.71)
P2	< 0.001	< 0.001	0.286	0.015	0.046	0.033	0.759
Neutralizing antibodies against the omicron sublineage BF.7
GMT	820.7 (480.7-1401.1)	739.3 (296.5-1843.4)	1881.0 (565.3-6259.2)	13221.3 (4496.9-38871.9)	16555.3 (10412.0-26323.3)	10553.7 (4950.9-22497.3)	5900.7 (2564.8-13575.4)
GMR1	0.02 (0.01-0.04)	0.01 (0.003-0.03)	0.06 (0.02-0.22)	0.84 (0.32-2.25)	0.37 (0.16-0.84)	1.04 (0.47-2.3)	0.75 (0.32-1.79)
P1	< 0.001	< 0.001	< 0.001	0.731	0.018	0.918	0.514
GMR2	0.01 (0.004 -0.03)	0.01 (0.003-0.03)	0.09 (0.03-0.31 )	2.43 (0.91-6.50)	0.31 (0.13-0.70)	0.51 (0.23-1.13)	3.66 (1.54-8.69)
P2	< 0.001	< 0.001	< 0.001	0.074	0.005	0.095	0.004
Neutralizing antibodies against the omicron sublineage BQ.1.1
GMT	1226.8 (389.5-3864.1)	2674.9 (1265.2-5655.8)	1453.0 (823.8-2562.7)	12773.8 (6580.4-24796.4)	16929.5 (8973.9-31938.1)	1842.8 (1054.7-3219.8)	1921.8 (1051.5-3512.1)
GMR1	0.02 (0.01-0.06)	0.04 (0.01-0.10)	0.05 (0.01-0.17)	0.82 (0.31-2.17)	0.38 (0.16-0.86)	0.18 (0.08-0.40)	0.24 (0.10-0.58)
P1	< 0.001	< 0.001	< 0.001	0.679	0.021	< 0.001	0.002
GMR2	0.02(0.01 -0.05)	0.04 (0.01-0.10)	0.07 (0.02-0.24)	2.35 (0.88-6.28)	0.31 (0.14-0.71)	0.09 (0.04-0.20)	1.19 (0.50-2.83)
P2	< 0.001	< 0.001	< 0.001	0.086	0.005	< 0.001	0.687
Neutralizing antibodies against the omicron sublineage XBB.1.5
GMT	25.0 (9.3-67.3)	18.9 (13.2-27.1)	231.06 (42.5-1256.0)	1973.2 (1060.8-3670.3)	2034.4 (1087.4-3806.0)	28551.1 (6721.3-121280.4)	22251.8 (15549.3-31843.4)
GMR1	0.0005 (0.0002-0.0013)	0.0002 (0.0001-0.0007)	0.008 (0.002-0.027)	0.12 (0.05-0.33)	0.05 (0.01-0.10)	2.68 (1.21-5.94)	2.83 (1.20-6.73)
P1	< 0.001	< 0.001	< 0.001	< 0.001	< 0.001	0.016	0.019
GMR2	0.0003 (0.0001-0.0009)	0.0002 (0.0001-0.0007)	0.011 (0.003-0.038)	0.36 (0.14-0.97)	0.04 (0.02-0.09)	1.31 (0.59-2.89)	13.83 (5.82-32.67)
P2	< 0.001	< 0.001	< 0.001	0.043	< 0.001	0.501	< 0.001
Neutralizing antibodies against the omicron sublineage JN.1
GMT	162.6 (56.0-472.1)	311.3 (101.8-952.0)	441.7 (239.7-813.8)	455.1 (190.2-1088.8)	935.8 (382.5-2289.5)	3787.2 (1745.9-8215.1)	565.8 (227.3-1408.1)
GMR1	0.003 (0.001-0.008)	0.0041 (0.0014-0.0118)	0.015 (0.002-0.051)	0.03 (0.01-0.08)	0.02 (0.01-0.05)	0.37 (0.17-0.83)	0.07 (0.03-0.17)
P1	< 0.001	< 0.001	< 0.001	< 0.001	< 0.001	0.016	< 0.001
GMR2	0.0022 (0.0008-0.0061)	0.004 (0.0014-0.0116)	0.02 (0.01-0.07)	0.08 (0.03-0.22)	0.02 (0.01-0.04)	0.18 (0.08-0.40)	0.35 (0.15-0.84)
P2	< 0.001	< 0.001	< 0.001	< 0.001	< 0.001	< 0.001	0.018
Note: Geometric mean ratio (GMR) was calculated using linear regression model. GMR1 and P1 were calculated by comparing to the SARS-CoV-2 prototype, while GMR2 and P2 were calculated by comparing to the SARS-CoV-2 alpha variant.
