# Supplementary material for: Mapping immune imprinting zones enables predictive vaccination optimization
Source: Research Square preprint supplement (doi:10.21203/rs.3.rs-7719056/v1), 2025-10-09
Supplement: Supplementary file 2 [file 768e953c8cbafb39d1839b52.xlsx]

## Sheet: Sheet1
Supplementary Table 18 Yisimayi et al. (2023) Dataset
	Vaccination strategies																	Neutralization titers
batch_number	vaccine_varient				vaccine_time				vaccine_type				vaccine_amount				t_sample	Prototype	BA.5	BQ.1.1	XBB.1.5		variant number	vaccination variant
1	1	1			0	14			1	1			3	3			21	3236	97	31	30		1	Prototype
2	2	2			0	14			1	1			3	3			21	43	21949	4100	73		2	BA.5
3	3	3			0	14			1	1			3	3			21	31	5213	14357	139		3	BQ.1.1
4	4	4			0	14			1	1			3	3			21	31	383	795	5561		4	XBB.1.5
5	1	1	2		0	14	44		1	1			3	3			51	12601	4197	823	96
6	1	1	3		0	14	44		1	1			3	3			51	9221	2564	2450	156
7	1	1	3		0	14	104		1	1			3	3			111	11940	3042	2748	162
8	1	1	3		0	14	194		1	1			3	3			201	12115	3604	3103	202
9	1	1	4		0	14	44		1	1			3	3			51	5044	1002	328	559
10	1	1	4		0	14	104		1	1			3	3			111	8732	1020	394	552
11	1	1	4		0	14	194		1	1			3	3			201	9488	1457	501	693
12	1	1	2	2	0	14	44	74	1	1	1	1	3	3	10	10	81	15475	10332	3723	494
13	1	1	2	2	0	14	44	134	1	1	1	1	3	3	10	10	141	17920	19614	7705	626
14	1	1	3	3	0	14	44	74	1	1	1	1	3	3	10	10	81	14831	8078	8880	928
15	1	1	3	3	0	14	44	134	1	1	1	1	3	3	10	10	141	16983	12091	13622	1754
16	1	1	3	3	0	14	104	134	1	1	1	1	3	3	10	10	141	17544	13501	11588	1211
17	1	1	3	3	0	14	194	224	1	1	1	1	3	3	10	10	231	12074	15397	13275	1178
18	1	1	4	4	0	14	44	74	1	1	1	1	3	3	10	10	81	11775	3345	792	1641
19	1	1	4	4	0	14	44	134	1	1	1	1	3	3	10	10	141	12541	4420	1598	5182
20	1	1	4	4	0	14	104	134	1	1	1	1	3	3	10	10	141	11133	4075	888	2841
21	1	1	4	4	0	14	194	224	1	1	1	1	3	3	10	10	231	11684	4698	1085	3373
22	1	1	2		0	14	44		1	1	2		3	3	1		51	20782	6934	1693	179
23	1	1	2		0	14	44		1	1	2		3	3	10		51	39060	15974	3452	473
24	1	1	3		0	14	44		1	1	2		3	3	1		51	16795	3401	3162	360
25	1	1	3		0	14	44		1	1	2		3	3	10		51	18224	4157	6677	505
26	1	1	4		0	14	44		1	1	2		3	3	1		51	10672	978	554	602
27	1	1	4		0	14	44		1	1	2		3	3	10		51	12082	2749	787	2431
28	1	1	2	2	0	14	44	74	1	1	2	2	3	3	1	1	81	43546	31963	13892	1084
29	1	1	2	2	0	14	44	74	1	1	2	2	3	3	10	10	81	62536	79390	37460	3436
30	1	1	3	3	0	14	44	74	1	1	2	2	3	3	1	1	81	22421	29570	18060	4114
31	1	1	3	3	0	14	44	74	1	1	2	2	3	3	10	10	81	34667	49862	65667	12418
32	1	1	4	4	0	14	44	74	1	1	2	2	3	3	1	1	81	12026	3379	2468	8582
33	1	1	4	4	0	14	44	74	1	1	2	2	3	3	10	10	81	18012	35797	12694	56139
34	1	1			0	14			2	2			10	10			21	27330	648	257	83
35	1	1	2	0	0	14	44		2	2	1		10	10	10		51	60034	11053	2448	247
36	1	1	3	0	0	14	44		2	2	1		10	10	10		51	40541	6427	6070	400
37	1	1	4	0	0	14	44		2	2	1		10	10	10		51	27678	2005	654	1104
