# Supplementary material for: Mapping immune imprinting zones enables predictive vaccination optimization
Source: Research Square preprint supplement (doi:10.21203/rs.3.rs-7719056/v1), 2025-10-09
Supplement: Supplementary file 3 [file a2fe28b9b04c40629b64e2b3.xlsx]

## Sheet: sheet1
Supplementary Table 17 Geometric mean titer of neutralizing antibodies against SARS-CoV-2 variants at 14 days after two or three different doses of mRNA variant boosters based on two-dose CronaVac and geometric mean ratio comparing to the prototype and alpha, respectively.
Vaccine type	mRNA(Alpha/Beta)	mRNA(Alpha/Beta) +mRNA(Alpha/Beta)	mRNA(Alpha/Beta) +mRNA(BA.1)	mRNA(Alpha/Beta) +mRNA(BA.2/4/5)	mRNA(BA.1) +mRNA(BA.2/4/5)	mRNA(Alpha/Beta) +mRNA(BA.2/4/5+Alpha/Beta)	mRNA(Alpha/Beta) +mRNA(BA.1) +mRNA(BA.2/4/5+Alpha/Beta)	mRNA(Alpha/Beta) +mRNA(BA.2/4/5) +mRNA(BA.2/4/5+Alpha/Beta)
	(n=8)	(n=8)	(n=8)	(n=8)	(n=8)	(n=8)	(n=8)	(n=8)
Neutralizing antibodies against the protoype
GMT	14087.6 (8605.4-23062.1)	54554.1 (27214.2-109360.2)	31116.5 (18945.2-51107.1)	28717.5 (10156.1-81202.1)	19649.6 (12133.1-31822.8)	27932.8 (16745.4-46594.6)	32825.2 (19917.4-54098.1)	34553.8 (12379.2-96449.4)
GMR1	-	-	-	-	-	-	-	-
P1	-	-	-	-	-	-	-	-
GMR2	0.72 (0.23-2.25)	0.75 (0.27-2.04)	0.29 (0.12-0.73)	0.66 (0.18-2.46)	0.22 (0.06-0.73)	0.29 (0.12-0.73)	0.17 (0.07-0.44)	0.47 (0.16-1.32)
P2	0.555	0.53	0.009	0.523	0.01	0.025	< 0.001	0.158
Neutralizing antibodies against the variant alpha
GMT	19695.7 (10051.1-38595.1)	72970.8 (36376.2-146379.5)	106966.3 (36568.2-312889.1)	43797.8 (16583.6-115671.3)	91091.0 (48459.7-171226.1)	91228.1 (44402.2-187436.1)	191386.8 (92134.6-397558.5)	74310.1 (33650.1-164100.2)
GMR1	1.39 (0.44-4.41)	1.34(0.49-3.66)	3.43 (1.37-8.63)	1.53 (0.41-5.70)	4.63 (1.37-15.78)	3.43 (1.37-8.63)	5.82 (2.30-14.72)	2.14 (0.76-6.11)
P1	0.555	0.547	0.009	0.523	0.01	0.025	< 0.001	0.158
GMR2	-	-	-	-	-	-	-	-
P2	-	-	-	-	-	-	-	-
Neutralizing antibodies against the variant beta
GMT	13828.6 (9139.3-20924.0)	50129.1 (25037.7-100365.9)	42620.3 (18358.6-98944.7)	37650.4 (13578.9-104393.5)	24278.4 (13502.0-43655.8)	42290.0 (20868.2-85702.1)	63194.6 (39545.3-100986.9)	63917.7 (26279.2-155464.1)
GMR1	0.98 (0.31-3.10)	0.92 (0.34-2.51)	1.37 (0.54-3.43)	1.31 (0.35-4.92)	1.24 (0.36-4.20)	1.37 (0.54-3.43)	1.92 (0.76-4.86)	1.85 (0.66-5.24)
P1	0.974	0.861	0.496	0.682	0.717	0.424	0.157	0.255
GMR2	0.70 (0.22-2.20)	0.69 (0.25 -1.88)	0.40 (0.16-1.0)	0.86 (0.23-3.23)	0.27 (0.08-0.91)	0.40 (0.16-1.0)	0.33 (0.13-0.84)	0.86 (0.30-2.43)
P2	0.533	0.437	0.049	0.816	0.026	0.14	0.018	0.78
Neutralizing antibodies against the variant delta
GMT	6332.4 (4497.7-8915.4)	26714.5 (1815.8-9714.6)	20415.7 (13540.7-30781.4)	45973.3 (16625.0-127130.0)	21790.1 (10010.8-47429.6)	21215.6 (11061.4-40691.4)	29564.5 (14154.5-61751.2)	43108.5 (12414.5-149690.8)
GMR1	0.45 (0.14-1.41)	0.49 (0.18-1.34)	0.66 (0.26-1.65)	1.60 (0.43-5.98)	1.11 (0.33-3.76)	0.66 (0.26-1.65)	0.90 (0.36-2.28)	1.25 (0.44-3.53)
P1	0.161	0.142	0.362	0.476	0.859	0.595	0.82	0.681
GMR2	0.32 (0.10-1.01)	0.37 (0.13-1.0)	0.19 (0.08-0.48)	1.05 (0.28-3.94)	0.24 (0.07-0.81)	0.19 (0.08-0.48)	0.15 (0.06-0.39)	0.58 (0.20-1.65)
P2	0.048	0.04	< 0.001	0.941	0.016	0.006	< 0.001	0.313
Neutralizing antibodies against the omicron sublineage BA.1
GMT	935.0 (300.0-2914.2)	3926.0 (1911.6-8063.1)	9892.4 (5110.4-19149.2)	1789.8 (810.3-3953.6)	34026.4 (13811.6-83827.8)	4916.2 (2142.2-11282.2)	25676.3 (11024.1-59803.0)	20318.6 (6414.8-64358.7)
GMR1	0.07 (0.02-0.21)	0.07 (0.03-0.20)	0.32 (0.13-0.80)	0.06 (0.43-5.98)	1.73 (0.51-5.90)	0.32 (0.13-0.80)	0.78 (0.31-1.99)	0.59 (0.21-1.67)
P1	< 0.001	< 0.001	0.015	< 0.001	0.348	0.001	0.594	0.325
GMR2	0.05 (0.02-0.15)	0.04 (0.02 -0.15)	0.09 (0.04-0.23)	0.04 (0.01-0.15)	0.37 (0.11-1.27)	0.09 (0.08-0.48)	0.13 (0.05-0.34)	0.27 (0.10-0.77)
P2	< 0.001	< 0.001	< 0.001	< 0.001	0.094	< 0.001	< 0.001	0.018
Neutralizing antibodies against the omicron sublineage BA.2
GMT	1151.6 (305.8-4337.4)	2650.7 (1300.0-5404.4)	4862.5 (3622.1-6527.7)	5328.2 (1510.8-18791.4)	14761.4 (3281.1-66410.4)	4946.1 (2201.7-11111.5)	11650.5 (6892.1-19694.0)	31931.9 (13508.7-75481.0)
GMR1	0.08 (0.03-0.26)	0.05 (0.02-0.14)	0.16 (0.06-0.39)	0.19 (0.05-0.70)	0.75 (0.22-2.55)	0.16 (0.06-0.39)	0.36 (0.14-0.90)	0.93 (0.33-2.62)
P1	< 0.001	< 0.001	< 0.001	0.013	0.624	0.001	0.027	0.883
GMR2	0.06 (0.02-0.19)	0.04 (0.01-0.11)	0.03 (0.01-0.07)	0.10 (0.03-0.39)	0.12 (0.04-0.42)	0.03 (0.01-0.07)	0.02 (0.01-0.06)	0.23 (0.08-0.64)
P2	< 0.001	< 0.001	< 0.001	< 0.001	0.003	< 0.001	< 0.001	0.12
Neutralizing antibodies against the omicron sublineage BA.4/5
GMT	1217.4 (431.1-3437.9)	2808.9 (1201.9-6564.6)	2985.2 (1602.9-5559.7)	4562.4 (1182.7-17600.4)	11207.23(4305.4-29173.4)	0.10 (0.04-0.24)	4560.4 (2105.2-9879.2)	16764.6 (7921.7-35478.8)
GMR1	0.09 (0.03-0.27)	0.05 (0.02-0.13)	0.10 (0.04-0.24)	0.16 (0.04-0.59)	0.57 (0.17-1.95)	0.16 (0.06-0.39)	0.14 (0.05-0.35)	0.49 (0.17-1.38)
P1	< 0.001	< 0.001	< 0.001	0.007	0.337	< 0.001	< 0.001	0.182
GMR2	0.06 (0.02-0.18)	0.04 (0.01 -0.10)	0.05 (0.02-0.11)	0.12 (0.03-0.46)	0.16 (0.05-0.55)	0.05 (0.02-0.11)	0.06 (0.02-0.15)	0.43 (0.15-1.21)
P2	< 0.001	< 0.001	< 0.001	0.002	< 0.001	< 0.001	< 0.001	0.007
Neutralizing antibodies against the omicron sublineage BF.7
GMT	353.7 (117.5-1064.3)	820.7 (480.7-1401.1)	1461.3 (596.4-3580.3)	2566.3 (747.7-8808.6)	3870.2 (1189.0-12597.5)	2700.6 (697.7-10453.7)	1372.5 (442.9-4253.1)	13105.1 (6141.3-27965.2)
GMR1	0.03 (0.01-0.08)	0.02 (0.01-0.04)	0.05 (0.02-0.12)	0.09 (0.02-0.33)	0.20 (0.06-0.67)	0.05 (0.02-0.12)	0.04 (0.02-0.11)	0.38 (0.13-1.07)
P1	< 0.001	< 0.001	< 0.001	< 0.001	0.007	< 0.001	< 0.001	0.075
GMR2	0.02 (0.01-0.06)	0.01 (0.004 -0.03)	0.014 (0.005-0.034)	0.06 (0.02-0.22)	0.042 (0.013-0.145)	0.014 (0.005-0.034)	0.007 (0.003-0.018)	0.18 (0.06-0.50)
P2	< 0.001	< 0.001	< 0.001	< 0.001	< 0.001	< 0.001	< 0.001	0.002
Neutralizing antibodies against the omicron sublineage BQ.1.1
GMT	196.1 (54.7-703.0)	1226.8 (389.5-3864.1)	1112.5 (561.4-2204.8)	3254.7 (1284.0-8249.7)	4109.9 (1177.6-14343.9)	2270.5 (906.0-5690.3)	2525.2 (930.5-6853.2)	5653.6 (3148.4-10152.3)
GMR1	0.01 (0.005-0.043)	0.02 (0.01-0.06)	0.04 (0.01-0.09)	0.11 (0.03-0.42)	0.21 (0.06-0.71)	0.04 (0.01-0.09)	0.08 (0.03-0.19)	0.16 (0.06-0.46)
P1	< 0.001	< 0.001	< 0.001	0.001	0.009	< 0.001	< 0.001	0.001
GMR2	0.010 (0.003-0.031)	0.02(0.01 -0.05)	0.01 (0.004-0.026)	0.07 (0.02-0.28)	0.045 (0.013-0.154)	0.10 (0.004-0.0026)	0.013 (0.005-0.033)	0.08 (0.03-0.21)
P2	< 0.001	< 0.001	< 0.001	< 0.001	< 0.001	< 0.001	< 0.001	< 0.001
Neutralizing antibodies against the omicron sublineage XBB.1.5
GMT	25.1 (7.4-84.4)	25.0 (9.3-67.3)	42.437 (16.3-110.6)	101.4 (21.5-478.413)	936.5 (216.8-4281.8)	284.9 (61.0-1331.1)	359.2 (177.3-727.6)	1004.6 (489.3-2062.4)
GMR1	0.002 (0.001-0.006)	0.0005 (0.0002-0.0013)	0.0014 (0.0005-0.0034)	0.0035 (0.0009-0.0132)	0.05 (0.01-0.17)	0.0014 (0.0005-0.0034)	0.011 (0.004-0.028)	0.03 (0.01-0.08)
P1	< 0.001	< 0.001	< 0.001	< 0.001	< 0.001	< 0.001	< 0.001	< 0.001
GMR2	0.001 (0.0004-0.004)	0.0003 (0.0001-0.0009)	0.0004 (0.0002-0.001)	0.0023 (0.0006-0.0087)	0.011 (0.003-0.036)	0.0004 (0.0002-0.001)	0.0019 (0.0007-0.0047)	0.014 (0.005-0.038)
P2	< 0.001	< 0.001	< 0.001	< 0.001	< 0.001	< 0.001	< 0.001	< 0.001
Neutralizing antibodies against the omicron sublineage JN.1
GMT	109.2 (45.7-261.4)	162.6 (56.0-472.1)	310.6 (166.4-579.5)	169.5 (96.2-298.8)	440.7 (158.2-1227.7)	354.8 (142.8-881.7)	759.6 (287.0-2010.5)	623.5 (281.9-1379.0)
GMR1	0.008 (0.002-0.024)	0.003 (0.001-0.008)	0.10 (0.00 -0.025)	0.0059 (0.0016-0.0132)	0.02 (0.01-0.08)	0.01 (0.004-0.025)	0.023 (0.009-0.059)	0.02 (0.01-0.05)
P1	< 0.001	< 0.001	< 0.001	< 0.001	< 0.001	< 0.001	< 0.001	< 0.001
GMR2	0.056 (0.0018-0.0175)	0.0022 (0.0008-0.0061)	0.0029 (0.001-0.007)	0.0039 (0.001-0.0145)	0.005 (0.001-0.016)	0.0029 (0.001-0.007)	0.004 (0.002-0.01)	0.008 (0.003-0.024)
P2	< 0.001	< 0.001	< 0.001	< 0.001	< 0.001	< 0.001	< 0.001	< 0.001
Note: Geometric mean ratio (GMR) was calculated using linear regression model. GMR1 and P1 were calculated by comparing to the SARS-CoV-2 prototype, while GMR2 and P2 were calculated by comparing to the SARS-CoV-2 alpha variant.
