# Supplementary material for: Mapping immune imprinting zones enables predictive vaccination optimization
Source: Research Square preprint supplement (doi:10.21203/rs.3.rs-7719056/v1), 2025-10-09
Supplement: Supplementary file 4 [file ed033bbe4253cc37230b5d96.xlsx]

## Sheet: GMR
Supplementary Table 15 Geometric mean titer of neutralizing antibodies against SARS-CoV-2 variants at 14 days after one-dose mRNA variant booster based on two-dose CoronaVac and geometric mean ratio comparing to the prototype and alpha, respectively.
Vaccine type	mRNA(Alpha/Beta)	mRNA(Delta)	mRNA(BA.1)	mRNA(BA.2/4/5)	mRNA(BA.2/4/5+Alpha/Beta)	mRNA(XBB.1.5+Alpha/Beta)	mRNA(XBB.1.5)
	(n=8)	(n=8)	(n=8)	(n=8)	(n=8)	(n=8)	(n=8)
Neutralizing antibodies against the protoype
GMT	14087.6 (8605.4-23062.1)	29140.7 (14784.6-57436.7)	19575.6 (10624.9-36066.7)	6292.0 (3399.6-11645.1)	16226.9 (9742.4-27027.5)	11218.1 (5934.4-21206.1)	5668.0 (2704.1-11880.7)
GMR1	-	-	-	-	-	-	-
P1	-	-	-	-	-	-	-
GMR2	0.72 (0.23-2.25)	0.59 (0.20-1.77)	0.77 (0.31-1.93)	0.91 (0.33-2.58)	1.26 (0.66-2.39)	0.66 (0.23-1.93)	4.92 (1.85-13.18)
P2	0.555	0.309	0.55	0.859	0.495	0.399	0.002
Neutralizing antibodies against the variant alpha
GMT	19695.7 (10051.1-38595.1)	49297.7 (18315.5-132689.0)	25499.8 (7517.6-86495.7)	6880.5 (2371.8-19959.5)	12951.5 (9739.8-17222.2)	16992.2 (8496.9-33981.3)	1149.8 (573.9-2303.7)
GMR1	1.39 (0.44-4.41)	1.69 (0.57-5.06)	1.30 (0.52-3.27)	1.09 (0.39-3.07)	0.80 (0.42-1.53)	1.52 (0.52-4.44)	0.02 (0.08-0.54)
P1	0.555	0.309	0.55	0.859	0.495	0.472	0.002
GMR2	-	-	-	-	-	-	-
P2	-	-	-	-	-	-	-
Neutralizing antibodies against the variant beta
GMT	13828.6 (9139.3-20924.0)	23792.6 (12147.5-46601.2)	8681.6 (3148.4-23939.3)	3485.6 (875.4-13877.9)	13745.6 (8487.3-22261.6)	10635.5 (5331.7-21215.6)	927.1 (370.1-2322.5)
GMR1	0.98 (0.31-3.10)	0.82 (0.27-2.45)	0.44 (0.18-1.12)	0.55 (0.20-1.56)	0.85 (0.44-1.61)	0.95 (0.32-2.77)	0.16 (0.06-0.44)
P1	0.974	0.694	0.069	0.243	0.615	0.913	< 0.001
GMR2	0.70 (0.22-2.20)	0.48 (0.16-1.44)	0.34 (0.14-0.85)	0.51 (0.18-1.42)		0.62 (0.21-1.84)	0.81 (0.30-2.14)
P2	0.533	0.16	0.017	0.18	0.857	0.341	0.663
Neutralizing antibodies against the variant delta
GMT	6332.4 (4497.7-8915.4)	11301.0 (7083.9-18028.5)	4827.9 (2377.3-9804.7)	4233.9 (1686.1-10631.8)	6478.4 (3205.5-13092.9)	764.5 (353.3-1654.6)	139.8 (83.1-235.2)
GMR1	0.45 (0.14-1.41)	0.39 (0.13-1.16)	0.25 (0.10-0.62)	0.67 (0.24-1.89)	0.40 (0.21-0.76)	0.07 (0.02-0.20)	0.02 (0.01-0.07)
P1	0.161	0.069	0.002	0.432	0.007	< 0.001	< 0.001
GMR2	0.32 (0.10-1.01)	0.23 (0.08-0.68)	0.19 (0.08-0.48)	0.62 (0.22-1.73)	0.50 (0.26-0.95)	0.05 (0.02-0.13)	0.12 (0.05-0.32)
P2	0.048	0.005	< 0.001	0.336	0.039	< 0.001	< 0.001
Neutralizing antibodies against the omicron sublineage BA.1
GMT	935.0 (300.0-2914.2)	1828.2 (765.1-4368.4)	3759.8 (2435.3-5804.8)	671.3 (324-1391.1)	1309.8 (746.1-2299.5)	778.5 (330.8-1832.1)	117.3 (28.4-484.6)
GMR1	0.07 (0.02-0.21)	0.06 (0.02-0.19)	0.19 (0.08-0.48)	0.11 (0.04-0.30)	0.08 (0.04-0.15)	0.07 (0.02-0.20)	0.02 (0.01-0.07)
P1	< 0.001	< 0.001	< 0.001	< 0.001	< 0.001	< 0.001	< 0.001
GMR2	0.05 (0.02-0.15)	0.04 (0.01-0.11)	0.15 (0.06-0.37)	0.10 (0.03-0.28)	0.10 (0.05-0.19)	0.05 (0.02-0.13)	0.10 (0.04-0.27)
P2	< 0.001	< 0.001	< 0.001	< 0.001	< 0.001	< 0.001	< 0.001
Neutralizing antibodies against the omicron sublineage BA.2
GMT	1151.6 (305.8-4337.4)	3053.7 (1570.4-5938.1)	1812.4 (1114.3-2947.9)	4380.9 (2318.5-8277.8)	2686.8 (1820.4-3965.7)	1487.3 (774.2-2857.4)	165.7 (117.8-233.2)
GMR1	0.09 (0.03-0.27)	0.13 (0.04-0.40)	0.08 (0.03-0.20)	0.44 (0.15-1.22)	0.16 (0.08-0.31)	0.06 (0.02-0.19)	0.03 (0.01-0.08)
P1	< 0.001	< 0.001	< 0.001	0.102	< 0.001	< 0.001	< 0.001
GMR2	0.06 (0.02-0.19)	0.08 (0.03-0.23)	0.06 (0.02-0.15)	0.40 (0.14-1.12)	0.20 (0.11-0.38)	0.04 (0.01-0.12)	0.15 (0.06-0.39)
P2	< 0.001	< 0.001	< 0.001	0.07	< 0.001	< 0.001	< 0.001
Neutralizing antibodies against the omicron sublineage BA.4/BA.5
GMT	1217.4 (431.1-3437.9)	3856.3 (1404-10591.5)	1552.6 (1054.2-2286.7)	2737.2 (1862.7-4022.2)	2608.0 (1463.5-4647.6)	711.2 (291.2-1737.1)	168.7 (121.8-233.7)
GMR1	0.08 (0.03-0.26)	0.11 (0.04-0.31)	0.09 (0.04-0.23)	0.70 (0.25-1.96)	0.17 (0.09-0.32)	0.13 (0.05-0.39)	0.03 (0.01-0.08)
P1	< 0.001	< 0.001	< 0.001	0.473	< 0.001	< 0.001	< 0.001
GMR2	0.06 (0.02-0.18)	0.06 (0.02-0.19)	0.07 (0.03-0.18)	0.64 (0.23-1.79)	0.21 (0.11-0.40)	0.09 (0.03-0.26)	0.14 (0.05-0.38)
P2	< 0.001	< 0.001	< 0.001	0.371	< 0.001	< 0.001	< 0.001
Neutralizing antibodies against the omicron sublineage BQ.1.1
GMT	353.7 (117.5-1064.3)	1124.6 (354.6-3566.8)	407.9 (149.8-1110.5)	2568.1 (1445.3-4563.4)	1584.8 (887.1-2831.2)	476.0 (278.3-814.1)	853.0 (353.7-2056.9)
GMR1	0.03 (0.01-0.08)	0.04 (0.01-0.12)	0.02 (0.01-0.05)	0.41 (0.14-1.15)	0.10 (0.05-0.19)	0.04 (0.01-0.12)	0.15 (0.06-0.40)
P1	< 0.001	< 0.001	< 0.001	0.078	< 0.001	< 0.001	< 0.001
GMR2	0.02 (0.01-0.06)	0.02 (0.01-0.07)	0.02 (0.01-0.04)	0.37 (0.13-1.05)	0.12 (0.06-0.23)	0.03 (0.01-0.08)	0.74 (0.28-1.97)
P2	< 0.001	< 0.001	< 0.001	0.053	< 0.001	< 0.001	0.546
Neutralizing antibodies against the omicron sublineage BQ.1.1
GMT	196.1 (54.7-703.0)	1009.6 (436.0-2338.0)	445.8 (272.0-730.4)	2146.9 (1242.0-3711.2)	824.6 (674.8-1007.7)	67.7 (17.7-259.0)	112.6 (42.1-300.6)
GMR1	0.01 (0.005-0.043)	0.03 (0.012-0.096)	0.02 (0.01-0.06)	0.34 (0.12-0.96)	0.051 (0.026-0.098)	0.006 (0.002-0.018)	0.02 (0.01-0.05)
P1	< 0.001	< 0.001	< 0.001	0.036	< 0.001	< 0.001	< 0.001
GMR2	0.010 (0.003-0.031)	0.02 (0.01-0.06)	0.02 (0.01-0.04)	0.31 (0.11-0.88)	0.06 (0.03-0.12)	0.004 (0.001-0.012)	0.10 (0.04-0.26)
P2	< 0.001	< 0.001	< 0.001	0.023	< 0.001	< 0.001	< 0.001
Neutralizing antibodies against the omicron sublineage XBB.1.5
GMT	25.1 (7.4-84.4)	69.1 (15.3-311.1)	21.2 (9.4-47.9)	220.1 (63.8-759.5)	445.0 (245.5-806.5)	862.396 (213.459-3484.176)	1547.0 (710.4-3369.1)
GMR1	0.002 (0.001-0.006)	0.002 ( 0.001 ~ 0.007 )	0.001 (0.0004-0.0027)	0.03 (0.01-0.10)	0.027 (0.014-0.052)	0.08 (0.03-0.23)	0.27 (0.10-0.73)
p1	< 0.001	< 0.001	< 0.001	< 0.001	< 0.001	< 0.001	0.01
GMR2	0.001 (0.0004-0.004)	0.001 (0.0005-0.004)	0.001 (0.0003-0.002)	0.032 (0.011-0.09)	0.03 (0.02-0.07)	0.05 (0.02-0.15)	1.35 (0.50-3.58)
p2	< 0.001	< 0.001	< 0.001	0.01	< 0.001	< 0.001	0.549
Neutralizing antibodies against the omicron sublineage JN.1
GMT	109.2 (45.7-261.4)	256.1 (122.9-534.0)	141.6 (48.9-410.0)	69.8 (33.6-144.9)	129.3 (85.7-195.2)	211.2 (109.0-409.5)	65.9 (27.4-158.5)
GMR1	0.008 (0.002-0.024)	0.001 (0.003-0.026)	0.0072(0.0029-0.0182)	0.01 (0.004-0.03)	0.008 (0.004-0.015)	0.019 (0.006-0.055)	0.01 (0.004-0.03)
P1	< 0.001	< 0.001	< 0.001	< 0.001	< 0.001	< 0.001	< 0.001
GMR2	0.056 (0.0018-0.0175)	0.0052 (0.0017-0.0155)	0.006 (0.002-0.014)	0.01 (0.004-0.029)	0.01 (0.005-0.02)	0.012 (0.004-0.036)	0.06 (0.02-0.15)
P2	< 0.001	< 0.001	< 0.001	< 0.001	< 0.001	< 0.001	< 0.001
Note: Geometric mean ratio (GMR) was calculated using linear regression model. GMR1 and P1 were calculated by comparing to the SARS-CoV-2 prototype, GMR2 and P2 were calculated by comparing to the SARS-CoV-2 alpha variant, while GMR3 and P3 were calculated by comparing to the RQ3013.
