# Supplementary material for: Mapping immune imprinting zones enables predictive vaccination optimization
Source: Research Square preprint supplement (doi:10.21203/rs.3.rs-7719056/v1), 2025-10-09
Supplement: Supplementary file 5 [file f6b75550e7e5c463d3eaaa17.xlsx]

## Sheet: sheet1
Supplementray Table 14 Geometric mean titer of neutralizing antibodies against SARS-CoV-2 variants at 14 days after two-dose mRNA variant vaccines and geometric mean ratio comparing to the prototype and alpha，respectively.
Vaccine type	mRNA(Alpha/Beta)	mRNA(Delta)	mRNA(BA.1)	mRNA(BA.2/4/5)	mRNA(BA.2/4/5+Alpha/Beta)	mRNA(XBB.1.5+Alpha/Beta)	mRNA(XBB.1.5)	mRNA(JN.1)
	(n=8)	(n=8)	(n=8)	(n=8)	(n=8)	(n=8)	(n=8)	(n=8)
Neutralizing antibodies against the protoype
GMT	260.3 (100.7-673.2)	1620.3 (729.2-3600.5)	58.6 (23.1-148.8)	145.6 (72.2-293.7)	370.2 (207.3-661.1)	5207.7 (3447.6-7866.2)	912.9 (388.2-2146.8)	910.2 (315.6-2625.3)
GMR1	-	-	-	-	-	-	-	-
P1	-	-	-	-	-	-	-	-
GMR2	0.15 (0.06-0.37)	0.83 (0.28-2.45)	0.81 (0.27-2.48)	1.66 (0.73-3.78)	0.16 (0.06-0.44)	0.30 (0.13-0.66)	1.18 (0.55-2.53)	1.64 (0.35-7.62)
P2	< 0.001	0.704	0.735	0.242	< 0.001	0.005	0.672	0.283
Neutralizing antibodies against the variant alpha
GMT	1780.1 (697.9-4540.1)	1953.1 (823.4-4632.9)	71.9 (27.9-185.6)	87.6 (47.4-161.9)	2365.1 (1743.2-3209.0)	17663.2 (10993.5-28379.6)	771.2 (280.7-2118.6)	558.3 (160.8-1938.7)
GMR1	6.82 (2.73-17.15)	1.21 (0.41-3.20)	1.23 (0.40-3.73)	0.60 (0.26-1.37)	6.41 (2.30-17.75)	3.39 (1.51-7.62)	0.85 (0.40-1.80)	0.61 (0.12-2.87)
P1	< 0.001	0.704	0.735	0.242	< 0.001	0.005	0.672	0.283
GMR2	-	-	-	-	-	-	-	-
P2	-	-	-	-	-	-	-	-
Neutralizing antibodies against the variant beta
GMT	1163.8 (682.4-1984.7)	1545.8 (760.4-3142.3)	140.0 (52.6-372.5)	187.7 (76.9-458.2)	2073.0 (1060.6-4051.9)	8000.3 (5106.6-12533.8)	300.5 (161.4-559.6)	274.5 (75.6-996.9)
GMR1	4.47 (1.78-11.24)	0.95 (0.32-2.81)	2.39 (0.78-7.31)	1.29 (0.57-2.93)	5.62 (2.01-15.56)	1.54 (0.68-3.46)	0.33 (0.15-0.70)	0.30 (0.06-1.40)
P1	0.004	0.924	0.153	0.556	< 0.001	0.311	0.007	0.042
GMR2	0.66 (0.26-1.64)	0.79 (0.27-2.33)	1.95 (0.64-5.94)	2.14 (0.94-4.89)	0.88 (0.32-2.43)	0.45 (0.20-1.02)	0.39 (0.18-0.84)	0.49 (0.11-2.30)
P2	0.401	0.634	0.273	0.081	0.791	0.064	0.018	0.335
Neutralizing antibodies against the variant delta
GMT	141.3 (66.9-298.5)	6210.7 (2973.4-12372.4)	107.2 (28.8-399.0)	358.8 (166.1-775.1)	1004.1 (491.9-2049.8)	276.5 (136.0-562.2)	136.6(78.2-238.7)	23.6 (13.9-39.8)
GMR1	0.54 (0.22-1.36)	3.84 (1.30-11.31)	1.83 (0.60-5.58)	2.46 (1.08-5.62)	2.71 (0.98-7.52)	0.05 (0.02-0.12)	0.15 (0.07-0.32)	0.03 (0.006-0.12)
P1	0.228	0.008	0.32	0.039	0.048	< 0.001	< 0.001	< 0.001
GMR2	0.08 (0.03-0.20)	3.18 (1.08-9.38)	1.49 (0.49-4.56)	4.08 (1.80-9.32)	0.42 (0.15-1.18)	0.02 (0.01-0.04)	0.18 (0.08-0.38)	0.04 (0.01-0.20)
P2	< 0.001	0.021	0.51	0.002	0.088	< 0.001	< 0.001	< 0.001
Neutralizing antibodies against the omicron sublineage BA.1
GMT	115.5 (37.4-356.4)	281.5 (101.7-779.0)	1807.8 (764.4-4271.9)	527.9 (196.7-1417.3)	414.7 (139.8-1230.4)	957.1 (372.1-2461.9)	34.5 (18.4-64.5)	242.4 (71.4-833.5)
GMR1	0.44 (0.18-1.11)	0.17 (0.06-0.51)	30.91 (10.13-94.35)	3.63 (1.59-8.28)	1.12 (0.40-3.12)	0.18 (0.08-0.41)	0.04 (0.02-0.08)	0.27 (0.06-1.24)
P1	0.11	< 0.001	< 0.001	0.004	0.819	< 0.001	< 0.001	< 0.001
GMR2	0.06 (0.03-0.16)	0.14 (0.05-0.43)	25.11 (8.22-76.64)	6.02 (2.62-13.74)	0.18 (0.06-0.49)	0.05 (0.02-0.12)	0.04 (0.02-0.10)	0.44 (0.09-2.03)
P2	< 0.001	< 0.001	< 0.001	< 0.001	< 0.001	< 0.001	< 0.001	< 0.001
Neutralizing antibodies against the omicron sublineage BA.2
GMT	58.2 (22.4-151.2)	212.4 (109.2-412.9)	185.9 (65.6-526.6)	2598.4 (1295.5-5211.5)	2934.7 (1317.0-6539.6)	6210.0 (3119.1-12363.9)	2795.7 (1842.0-4243.2)	654.1 (152.5-2805.2)
GMR1	0.22 (0.09-0.56)	0.13 (0.04-0.39)	3.18 (1.04-9.65)	17.88 (7.84-40.50)	7.94 (2.85-22.01)	1.19 (0.53-2.68)	3.05 (1.43-6.54)	0.72 (0.16-3.34)
P1	< 0.001	< 0.001	0.811	0.811	< 0.001	0.317	< 0.001	0.007
GMR2	0.01 (0.005-0.03)	0.08 (0.03-0.23)	0.94 (0.31-2.87)	20.25 (8.88-46.21)	1.66 (0.60-4.63)	0.19 (0.09-0.44)	8.88 (4.14-19.03)	1.17 (0.25-5.46)
P2	< 0.001	< 0.001	0.921	< 0.001	0.309	< 0.001	< 0.001	0.103
Neutralizing antibodies against the omicron sublineage BA.4/BA.5
GMT	23.4 (11.6-47.2)	153.0 (68.8-340.1)	67.7 (18.8-244.1)	1775.9 (852.9-3697.5)	3929.3 (1598.3-9659.6)	3408.8 (1556.1-7467.8)	6848.5 (4328.1-10836.7)	1024.4 (211.4-4963.9)
GMR1	0.09 (0.04-0.23)	0.09 (0.03-0.28)	1.16 (0.38-3.53)	12.21 (5.35-27.86)	10.63 (3.81-29.45)	0.66 (0.29-1.47)	7.52 (3.51-16.00)	1.13 (0.24-5.24)
P1	0.004	< 0.001	0.06	0.06	< 0.001	0.677	0.006	0.007
GMR2	0.03 (0.01-0.08)	0.11 (0.04-0.32)	2.58 (0.85-7.89)	29.65 (13.0-67.65)	1.24 (0.45-3.36)	0.35 (0.16-0.79)	3.63 (1.69-7.78)	1.84 (0.40-8.57)
P2	< 0.001	< 0.001	0.12	< 0.001	0.664	0.016	0.001	0.105
Neutralizing antibodies against the omicron sublineage BF.7
GMT	26.2 (11.1-61.8)	98.7 (28.9-337.5)	34.5 (11.2-106.4)	1801.6 (1012.0-3207.0)	3119.1 (1056.1-9211.6)	2791.2 (1029.8-7565.5)	4685.9 (2713.2-8092.9)	1462.6 (266.2-8037.2)
GMR1	0.10 (0.04-0.25)	0.06 (0.02-0.18)	0.59 (0.19-1.79)	12.38 (5.43-28.35)	8.40 (3.03-23.43)	0.54 (0.24-1.21)	5.13 (2.39-11.00)	1.6 (0.34-7.46)
P1	< 0.001	< 0.001	0.382	0.382	< 0.001	0.143	< 0.001	< 0.001
GMR2	0.015 (0.006-0.037)	0.05 (0.02-0.15)	0.48 (0.16-1.46)	20.53 (9.06-46.85)	1.32 (0.48-3.66)	0.16 (0.07-0.36)	6.06 (2.85-13.00)	2.62 (0.56-12.21)
P2	< 0.001	< 0.001	0.227	< 0.001	0.578	< 0.001	< 0.001	0.016
Neutralizing antibodies against the omicron sublineage BQ.1.1
GMT	32.7 (15.4-69.6)	29.0 (13.1-64.4)	30.9 (17.3-55.4)	329.9 (200.5-542.7)	1253.7 (557.0-2821.6)	1385.6 (755.6-2541.1)	662.1 (302.5-1449.0)	479.718 (131.784-1746.263)
GMR1	0.13 (0.05-0.31)	0.02 (0.01-0.05)	0.53 (0.17-1.61)	2.27 (0.99-5.17)	3.39 (1.22-9.38)	0.27 (0.12-0.60)	0.73 (0.34-1.55)	0.53 (0.11-2.46)
P1	< 0.001	< 0.001	0.293	0.061	0.016	0.002	0.421	< 0.001
GMR2	0.02 (0.007-0.046)	0.015 (0.02-0.04)	0.43 (0.14-1.31)	3.76 (1.66-8.57)	0.53 (0.19-1.47)	0.08 (0.03-0.18)	0.86 (0.40-1.84)	0.86 (0.18-4.00)
P2	< 0.001	< 0.001	0.166	0.003	0.204	< 0.001	0.695	< 0.001
Neutralizing antibodies against the omicron sublineage XBB.1.5
GMT	15.0 (15.0-15.0)	17.6 (12.1-25.5)	17.4 (12.2-24.8)	209.6 (17.4-24.8)	240.3 (65.4-882.8)	16888.5 (11837.7-24094.3)	33068.8 (19640.7-55677.5)	207.6 (49.3-875.0)
GMR1	0.06 (0.02-0.14)	0.011 (0.004-0.032)	0.30 (0.11-0.91)	1.44 (0.63-3.27)	0.65 (0.23-1.80)	3.25 (1.44-7.31)	36.25 (16.91-77.71)	0.23 (0.05-1.06)
P1	< 0.001	< 0.001	0.018	0.462	0.427	0.061	< 0.001	< 0.001
GMR2	0.008 (0.003-0.021)	0.009 (0.003-0.026)	0.24 (0.08-0.74)	2.39 (1.05-5.43)	0.10 (0.04-0.28)	0.96 (0.43-2.14)	42.81 (20.11-91.77)	0.37 (0.08-1.73)
P2	< 0.001	< 0.001	0.009	0.079	< 0.001	0.943	< 0.001	< 0.001
Neutralizing antibodies against the omicron sublineage JN.1
GMT	19.5 (14.2-26.7)	86.6 (15.0-502.0)	23.4 (14.1-38.6)	25.8 (15.2-43.8)	31.5 (17.9-54.0)	1054.7 (435.8-2552.5)	370.5 (192.6-712.9)	29148.9 (9158.2-92775.8)
GMR1	0.07 (0.03-0.19)	0.053 (0.018-0.016)	0.40 (0.13-1.21)	0.18 (0.08-0.40)	0.08 (0.03-0.23)	0.20 (0.09-0.46)	0.41 (0.19-0.87)	32.00 (6.87-149.09)
P1	< 0.001	< 0.001	0.274	0.144	0.131	0.017	< 0.001	< 0.001
GMR2	0.01 (0.004-0.027)	0.045 (0.015-0.131)	0.33 (0.11-0.99)	0.30 (0.13-0.67)	0.013 (0.005-0.037)	0.06 (0.03-0.13)	0.48 (0.23-1.03)	52.35 (11.24-243.88)
P2	< 0.001	< 0.001	0.154	0.01	< 0.001	0.666	< 0.001	< 0.001
Note: Geometric mean ratio (GMR) was calculated using linear regression model. GMR1 and P1 were calculated by comparing to the SARS-CoV-2 prototype, while GMR2 and P2 were calculated by comparing to the SARS-CoV-2 alpha variant.
